# Supplementary material
Source: publisher figshare collection journal article supplement (https://sage.figshare.com/ndownloader/files/17591450)
Supplement: Supplementary file 1 [file 17591450]

## Online Appendix

Table A1. *Distribution of Measurement Occasions across Individuals for each Day*

| Measures     | Day 1     | Day 2     | Day 3     | Day 4     | Day 5     | Day 6     | Day 7     | Day 8     |
|--------------|-----------|-----------|-----------|-----------|-----------|-----------|-----------|-----------|
| 1            | 20        | 22        | 23        | 23        | 21        | 25        | 21        | 14        |
| 2            | 9         | 13        | 20        | 10        | 11        | 12        | 13        | 12        |
| 3            | 2         | 9         | 7         | 12        | 8         | 7         | 12        | 5         |
| 4            | 2         | 8         | 6         | 1         | 5         | 1         | 5         | 5         |
| 5            | -         | 3         | 1         | 3         | 1         | 4         | 5         | 2         |
| <b>Total</b> | <b>33</b> | <b>55</b> | <b>57</b> | <b>49</b> | <b>46</b> | <b>49</b> | <b>56</b> | <b>38</b> |

*Note.* 78 individuals. The first measurement occasion for the first day was deleted because of the absence of lagged effects.

Table A2. *Average Number of Received Media Items and Total Number of Media Items by Day*

|                                        | Day 1          | Day 2          | Day 3          | Day 4          | Day 5          | Day 6          | Day 7          | Day 8          | Total                        |
|----------------------------------------|----------------|----------------|----------------|----------------|----------------|----------------|----------------|----------------|------------------------------|
| Average number of received media items | 0.67<br>(0.96) | 1.56<br>(1.47) | 1.45<br>(1.27) | 1.26<br>(1.34) | 1.18<br>(1.32) | 1.21<br>(1.34) | 1.64<br>(1.51) | 1.06<br>(1.39) | <b>1.25</b><br><b>(1.36)</b> |
| Newspaper items                        | 14             | 26             | 23             | 31             | 24             | 10             | 23             | 24             | <b>175</b>                   |
| Television items                       | 15             | 39             | 35             | 28             | 25             | 42             | 47             | 23             | <b>254</b>                   |
| Internet items                         | 23             | 57             | 55             | 39             | 43             | 42             | 58             | 36             | <b>353</b>                   |
| <b>Total</b>                           | <b>52</b>      | <b>122</b>     | <b>113</b>     | <b>98</b>      | <b>92</b>      | <b>94</b>      | <b>128</b>     | <b>83</b>      | <b>782</b>                   |

*Note.* 78 individuals, average number of media items received by individuals are means with standard deviations in brackets. Newspaper category includes also magazine articles. Television category includes all shows regardless of length. Internet category includes text and video.

Table A3. *Fixed Effects from emotional reactions on emotions (Table1 continued)*

|            | <i>Variable</i>                  | <i>Model1</i><br><i>Attention on Fear</i> |          | <i>Model2</i><br><i>Attention on Anger</i> |          | <i>Model3</i><br><i>Attention on Contentment</i> |          | <i>Model4</i><br><i>Attention on Happiness</i> |          |
|------------|----------------------------------|-------------------------------------------|----------|--------------------------------------------|----------|--------------------------------------------------|----------|------------------------------------------------|----------|
|            |                                  | <i>Est. (SE)</i>                          | <i>t</i> | <i>Est. (SE)</i>                           | <i>t</i> | <i>Est. (SE)</i>                                 | <i>t</i> | <i>Est. (SE)</i>                               | <i>t</i> |
| Lag.Effect | <i>Fear<sub>t-1</sub></i>        | -                                         | -        | -0.01 (0.05)                               | -0.18    | -0.01 (0.03)                                     | -0.28    | 0.08 (0.03)                                    | 2.38*    |
| Con.Effect | <i>Fear<sub>t</sub></i>          | -                                         | -        | 0.55 (0.05)                                | 11.05*** | 0.03 (0.04)                                      | 0.83     | -0.10 (0.03)                                   | -2.94**  |
| Lag.Effect | <i>Anger<sub>t-1</sub></i>       | 0.02 (0.03)                               | 0.80     | -                                          | -        | -0.01 (0.02)                                     | -0.49    | 0.00 (0.02)                                    | 0.02     |
| Con.Effect | <i>Anger<sub>t</sub></i>         | 0.27 (0.02)                               | 11.04*** | -                                          | -        | -0.11 (0.02)                                     | -4.57*** | -0.02 (0.02)                                   | -0.80    |
| Lag.Effect | <i>Contentment<sub>t-1</sub></i> | -0.00 (0.04)                              | -0.02    | 0.03 (0.06)                                | 0.47     | -                                                | -        | 0.05 (0.04)                                    | 1.36     |
| Con.Effect | <i>Contentment<sub>t</sub></i>   | 0.03 (0.04)                               | 0.79     | -0.26 (0.06)                               | -4.54*** | -                                                | -        | 0.65 (0.03)                                    | 23.04*** |
| Lag.Effect | <i>Happiness<sub>t-1</sub></i>   | -0.06 (0.04)                              | -1.46    | 0.08 (0.06)                                | 1.46     | 0.04 (0.04)                                      | 1.17     | -                                              | -        |
| Con.Effect | <i>Happiness<sub>t</sub></i>     | -0.13 (0.04)                              | -3.01**  | -0.05 (0.06)                               | -0.86    | 0.68 (0.03)                                      | 22.97*** | -                                              | -        |

*Note.* 782 observations, 78 individuals, Lag.Effect=Lagged Effect, Con.Effect=Contemporaneous Effect. This Table continues Table1. It only shows the effects from emotional reactions as independent variables on emotions as dependent variables. Coefficients are  $\beta_{120}$  to  $\beta_{170}$ . The models are exactly the same models shown in Table1. \*\*\* $p < .001$ , \*\* $p < .01$ , \* $p < .05$ , # $p < .10$ .
